# Supplementary material for: Etiologic features of diarrheagenic microbes in stool specimens from patients with acute diarrhea in Thailand
Source: PubMed Central journal article supplement (PMC7055299; doi:10.1038/s41598-020-60711-1), 2020-03-04
Supplement: 41598_2020_60711_MOESM1_ESM.pdf [file 41598_2020_60711_MOESM1_ESM.pdf]

# **Etiologic features of diarrheagenic microbes in stool specimens from patients with acute diarrhea in Thailand**

**Kazuhiisa Okada<sup>1,2\*</sup>, Warawan Wongboot<sup>1,3</sup>, Watcharaporn Kamjumhol<sup>1</sup>, Namfon Suebwongsa<sup>1</sup>, Piyada Wangroongsarb<sup>3</sup>, Pipat Kluabwang<sup>4</sup>, Nuttagarn Chuenchom<sup>5</sup>, Witaya Swaddiwudhipong<sup>6</sup>, Thanee Wongchai<sup>7</sup>, Weerawat Manosuthi<sup>8</sup>, Norrathep Assawapatchara<sup>9</sup>, Patchanee Khum-on<sup>10</sup>, Patpong Udompat<sup>11</sup>, Chareeya Thanee<sup>12</sup>, Suwatthiya Kitsaran<sup>13</sup>, Lakkana Jirapong<sup>14</sup>, Charoen Jaiwong<sup>15</sup>, Supalert Nedsuwan<sup>16</sup>, Chotipong Siripipattanamongkol<sup>17</sup>, Pilailuk Akkapaiboon Okada<sup>3</sup>, Siriporn Chantaroj<sup>3</sup>, Sho Komukai<sup>18</sup>, Shigeyuki Hamada<sup>1,2</sup>**

<sup>1</sup>Thailand-Japan Research Collaboration Center on Emerging and Re-emerging Infections, Nonthaburi, Thailand; <sup>2</sup>Research Institute for Microbial Diseases, Osaka University, Osaka, Japan; <sup>3</sup>National Institute of Health, Department of Medical Sciences, Nonthaburi, Thailand; <sup>4</sup>Department of Pediatrics, <sup>5</sup>Department of Medicine, <sup>6</sup>Department of Community and Social Medicine, and <sup>7</sup>Department of Clinical Laboratory, Maesot General Hospital, Tak, Thailand; <sup>8</sup>Department of Medicine, Bamrasnaradura Infectious Diseases Institute, Nonthaburi, Thailand; <sup>9</sup>Department of Medicine, Ranong Hospital, Ranong, Thailand; <sup>10</sup>Department of Medical Technology, Chum Phae Hospital, Khon Kaen, Thailand; <sup>11</sup>Department of Community and Social Medicine, Prapokkiao Hospital, Chanthaburi, Thailand; <sup>12</sup>Department of Pediatrics and <sup>13</sup>Department of Medicine, Sunpasitthiprasong Hospital, Ubon Ratchathani, Thailand; <sup>14</sup>Department of Radiology, Samutsakhon Hospital, Samutsakhon, Thailand; <sup>15</sup>Department of Pediatrics, <sup>16</sup>Department of Preventive and Social Medicine, and <sup>17</sup>Department of Medicine, Chiangrai Prachanukroh Hospital, Chiang Rai, Thailand; and <sup>18</sup>Department of Integrated Medicine of Graduate school of Medicine, Osaka University, Osaka, Japan

**\*Corresponding author:** Kazuhiisa Okada

**E-mail Address:** kazuhiisa@biken.osaka-u.ac.jp

## **Supplemental material**

**Table S1**

**Table S2**

**Table S3**

**Table S4**

**Figure S1**

**Figure S2**

**Figure S3**

**Methods**

**Figure S1.** Box and whisker plot showing quantitation cycle (Cq) values of qPCR-positive samples for 24 target genes among 370 diarrheal and 370 non-diarrheal control subjects. The bottom and top of each box represent 25th and 75th percentiles of the data, respectively. The median value is displayed inside the box by the line. The maximum and minimum values are displayed with vertical lines connecting the points to the center box, along with the outliers represented herein indicated by closed and open circles. Numbers indicate the number of positive specimens.

**Figure S2.** Detection of enteropathogens by month based on qPCR assays and distribution of Cq-values. The blue dots represent Cq values from the non-diarrheal control subjects and the red dots represent Cq values from the diarrheal patients. The red line indicates the cut-off value shown in Table 1.

**Figure S3.** Detection of enteropathogens by age group using qPCR assays and distribution of Cq-values. The blue dots represent Cq values from the non-diarrheal control subjects and the red dots represent Cq values from the diarrheal patients. The red line indicates the cut-off value shown in Table 1.

**Table S1. Clinical symptoms caused by each enteropathogen as determined based on quantitative PCR results and patient data**

|                           | All cases  |            |                     |             | Cases under Cq-cutoff value |           |                     |             |
|---------------------------|------------|------------|---------------------|-------------|-----------------------------|-----------|---------------------|-------------|
|                           | Yes        | No         | OR                  | P-value     | Yes                         | No        | OR                  | P-value     |
| <b>Rotavirus</b>          |            |            |                     |             |                             |           |                     |             |
| Fever                     | 90 (32.6)  | 11 (12.9)  | 3.14 (1.61-6.14)    | < 0.001 *** | 66 (23.9)                   | 11 (12.9) | 2.05 (1.04-4.04)    | 0.034 *     |
| Nausea                    | 19 (22.4)  | 82 (29.7)  | 0.69 (0.39-1.22)    | 0.215       | 18 (21.2)                   | 59 (21.4) | 1 (0.56-1.81)       | 1           |
| Vomiting                  | 74 (34.3)  | 27 (18.6)  | 2.25 (1.37-3.72)    | 0.001 **    | 62 (28.7)                   | 15 (10.3) | 3.41 (1.86-6.22)    | < 0.001 *** |
| Diarrhea (≥ 10 times/day) | 30 (31.6)  | 69 (27.1)  | 1.25 (0.75-2.08)    | 0.425       | 21 (22.1)                   | 54 (21.2) | 1.07 (0.61-1.88)    | 0.884       |
| Abdominal pain            | 18 (19.8)  | 83 (30.7)  | 0.57 (0.32-1)       | 0.058       | 14 (15.4)                   | 63 (23.3) | 0.61 (0.33-1.14)    | 0.139       |
| Fecal WBC                 | 3 (18.8)   | 25 (23.8)  | 0.82 (0.23-2.88)    | 0.762       | 1 (6.2)                     | 18 (17.1) | 0.46 (0.08-2.63)    | 0.462       |
| Fecal RBC                 | 6 (35.3)   | 19 (26.8)  | 1.52 (0.51-4.54)    | 0.553       | 4 (23.5)                    | 14 (19.7) | 1.32 (0.39-4.44)    | 0.743       |
| Hospital stay             |            |            | -0.66 (-1.45, 0.13) | 0.105       |                             |           | -0.57 (-1.47, 0.32) | 0.210       |
| <b>Norovirus GII</b>      |            |            |                     |             |                             |           |                     |             |
| Fever                     | 44 (15.9)  | 15 (17.6)  | 0.87 (0.46-1.65)    | 0.738       | 20 (7.2)                    | 9 (10.6)  | 0.64 (0.29-1.45)    | 0.361       |
| Nausea                    | 11 (12.9)  | 48 (17.4)  | 0.73 (0.36-1.46)    | 0.403       | 3 (3.5)                     | 26 (9.4)  | 0.4 (0.13-1.26)     | 0.108       |
| Vomiting                  | 47 (21.8)  | 12 (8.3)   | 2.99 (1.54-5.81)    | 0.001 **    | 24 (11.1)                   | 5 (3.4)   | 3.25 (1.26-8.41)    | 0.009 **    |
| Diarrhea (≥ 10 times/day) | 11 (11.6)  | 45 (17.6)  | 0.63 (0.31-1.26)    | 0.192       | 5 (5.3)                     | 22 (8.6)  | 0.63 (0.24-1.65)    | 0.371       |
| Abdominal pain            | 7 (7.7)    | 52 (19.3)  | 0.37 (0.17-0.83)    | 0.009 **    | 2 (2.2)                     | 27 (10.0) | 0.25 (0.07-0.92)    | 0.014 *     |
| Fecal WBC                 | 3 (18.8)   | 21 (20.0)  | 1.02 (0.29-3.62)    | 1           | 1 (6.2)                     | 10 (9.5)  | 0.88 (0.15-5.29)    | 1           |
| Fecal RBC                 | 1 (5.9)    | 20 (28.2)  | 0.23 (0.04-1.31)    | 0.062       | 1 (5.9)                     | 10 (14.1) | 0.53 (0.09-3.21)    | 0.684       |
| Hospital stay             |            |            | -0.61 (-1.58, 0.37) | 0.223       |                             |           | -0.28 (-1.62, 1.06) | 0.683       |
| <b>Shigella/EIEC</b>      |            |            |                     |             |                             |           |                     |             |
| Fever                     | 32 (11.6)  | 9 (10.6)   | 1.07 (0.5-2.31)     | 1           | 16 (5.8)                    | 5 (5.9)   | 0.93 (0.34-2.51)    | 1           |
| Nausea                    | 10 (11.8)  | 31 (11.2)  | 1.08 (0.51-2.28)    | 0.847       | 8 (9.4)                     | 13 (4.7)  | 2.14 (0.87-5.24)    | 0.115       |
| Vomiting                  | 25 (11.6)  | 16 (11.0)  | 1.05 (0.54-2.02)    | 1           | 13 (6.0)                    | 8 (5.5)   | 1.07 (0.44-2.6)     | 1           |
| Diarrhea (≥ 10 times/day) | 8 (8.4)    | 32 (12.5)  | 0.67 (0.3-1.48)     | 0.347       | 5 (5.3)                     | 15 (5.9)  | 0.94 (0.35-2.57)    | 1           |
| Abdominal pain            | 14 (15.4)  | 27 (10.0)  | 1.66 (0.83-3.29)    | 0.182       | 10 (11.0)                   | 11 (4.1)  | 2.91 (1.21-6.96)    | 0.020 *     |
| Fecal WBC                 | 7 (43.8)   | 9 (8.6)    | 8.02 (2.5-25.75)    | 0.001 **    | 7 (43.8)                    | 2 (1.9)   | 32.68 (6.75-158.38) | < 0.001 *** |
| Fecal RBC                 | 5 (29.4)   | 9 (12.7)   | 2.89 (0.86-9.74)    | 0.134       | 5 (29.4)                    | 4 (5.6)   | 6.6 (1.65-26.35)    | 0.012 *     |
| Hospital stay             |            |            | -0.31 (-1.41, 0.79) | 0.580       |                             |           | -0.74 (-2.23, 0.74) | 0.329       |
| <b>Campylobacter</b>      |            |            |                     |             |                             |           |                     |             |
| Fever                     | 36 (13.0)  | 4 (4.7)    | 2.75 (1-7.55)       | 0.031 *     | 16 (5.8)                    | 2 (2.4)   | 2.12 (0.55-8.18)    | 0.263       |
| Nausea                    | 9 (10.6)   | 31 (11.2)  | 0.97 (0.45-2.09)    | 1           | 4 (4.7)                     | 14 (5.1)  | 1 (0.34-2.96)       | 1           |
| Vomiting                  | 20 (9.3)   | 20 (13.8)  | 0.64 (0.33-1.23)    | 0.231       | 9 (4.2)                     | 9 (6.2)   | 0.66 (0.26-1.66)    | 0.461       |
| Diarrhea (≥ 10 times/day) | 3 (3.2)    | 36 (14.1)  | 0.23 (0.07-0.7)     | 0.003 **    | 1 (1.1)                     | 17 (6.7)  | 0.22 (0.04-1.17)    | 0.032 *     |
| Abdominal pain            | 7 (7.7)    | 33 (12.2)  | 0.63 (0.27-1.44)    | 0.334       | 2 (2.2)                     | 16 (5.9)  | 0.43 (0.11-1.67)    | 0.263       |
| Fecal WBC                 | 1 (6.2)    | 14 (13.3)  | 0.61 (0.1-3.57)     | 0.690       | 1 (6.2)                     | 9 (8.6)   | 0.98 (0.16-5.97)    | 1           |
| Fecal RBC                 | 3 (17.6)   | 6 (8.5)    | 2.43 (0.59-10.05)   | 0.367       | 3 (17.6)                    | 5 (7.0)   | 2.92 (0.68-12.51)   | 0.180       |
| Hospital stay             |            |            | 0.96 (-0.13, 2.06)  | 0.086       |                             |           | 0.72 (-0.76, 2.21)  | 0.342       |
| <b>EAEC (aggR)</b>        |            |            |                     |             |                             |           |                     |             |
| Fever                     | 74 (26.8)  | 27 (31.8)  | 0.78 (0.46-1.32)    | 0.408       | 9 (3.3)                     | 2 (2.4)   | 1.19 (0.29-4.88)    | 1           |
| Nausea                    | 22 (25.9)  | 79 (28.6)  | 0.88 (0.51-1.52)    | 0.680       | 3 (3.5)                     | 8 (2.9)   | 1.34 (0.38-4.77)    | 0.725       |
| Vomiting                  | 52 (24.1)  | 49 (33.8)  | 0.62 (0.39-0.99)    | 0.055       | 5 (2.3)                     | 6 (4.1)   | 0.56 (0.18-1.77)    | 0.360       |
| Diarrhea (≥ 10 times/day) | 23 (24.2)  | 70 (27.5)  | 0.85 (0.5-1.46)     | 0.588       | 1 (1.1)                     | 10 (3.9)  | 0.37 (0.07-2.09)    | 0.301       |
| Abdominal pain            | 27 (29.7)  | 74 (27.4)  | 1.12 (0.67-1.89)    | 0.687       | 1 (1.1)                     | 10 (3.7)  | 0.41 (0.07-2.31)    | 0.303       |
| Fecal WBC                 | 5 (31.2)   | 25 (23.8)  | 1.51 (0.5-4.58)     | 0.541       | 1 (6.2)                     | 4 (3.8)   | 2.18 (0.32-14.94)   | 0.514       |
| Fecal RBC                 | 6 (35.3)   | 17 (23.9)  | 1.76 (0.58-5.3)     | 0.366       | 1 (5.9)                     | 4 (5.6)   | 1.36 (0.2-9.35)     | 1           |
| Hospital stay             |            |            | -0.41 (-1.19, 0.38) | 0.311       |                             |           | -1.07 (-3.28, 1.13) | 0.341       |
| <b>EAEC (astA)</b>        |            |            |                     |             |                             |           |                     |             |
| Fever                     | 163 (59.1) | 54 (63.5)  | 0.83 (0.51-1.37)    | 0.527       | 7 (2.5)                     | 3 (3.5)   | 0.66 (0.18-2.39)    | 0.705       |
| Nausea                    | 52 (61.2)  | 165 (59.8) | 1.06 (0.64-1.73)    | 0.899       | 2 (2.4)                     | 8 (2.9)   | 0.95 (0.23-3.96)    | 1           |
| Vomiting                  | 129 (59.7) | 88 (60.7)  | 0.96 (0.63-1.48)    | 0.913       | 7 (3.2)                     | 3 (2.1)   | 1.46 (0.4-5.28)     | 0.746       |
| Diarrhea (≥ 10 times/day) | 56 (58.9)  | 152 (59.6) | 0.97 (0.6-1.56)     | 1           | 1 (1.1)                     | 8 (3.1)   | 0.46 (0.08-2.66)    | 0.454       |
| Abdominal pain            | 61 (67.0)  | 156 (57.8) | 1.48 (0.9-2.42)     | 0.138       | 1 (1.1)                     | 9 (3.3)   | 0.46 (0.08-2.6)     | 0.462       |
| Fecal WBC                 | 10 (62.5)  | 59 (56.2)  | 1.26 (0.44-3.61)    | 0.788       | 0 (0.0)                     | 4 (3.8)   | 0.68 (0.04-13.29)   | 1           |

|                              |            |           |                     |                |     |            |           |                     |                |    |
|------------------------------|------------|-----------|---------------------|----------------|-----|------------|-----------|---------------------|----------------|----|
| Fecal RBC                    | 10 (58.8)  | 38 (53.5) | 1.22 (0.43-3.46)    | 0.790          |     | 1 ( 5.9)   | 3 ( 4.2)  | 1.78 (0.24-12.98)   | 1              |    |
| Hospital stay                |            |           | -0.65 (-1.36, 0.06) | 0.072          |     |            |           | 0.65 (-1.95, 3.26)  | 0.624          |    |
| <b><i>Aeromonas</i></b>      | <b>Yes</b> | <b>No</b> | <b>OR</b>           | <b>P-value</b> |     | <b>Yes</b> | <b>No</b> | <b>OR</b>           | <b>P-value</b> |    |
| Fever                        | 44 (15.9)  | 19 (22.4) | 0.65 (0.36-1.19)    | 0.192          |     | 4 ( 1.4)   | 4 ( 4.7)  | 0.3 (0.08-1.13)     | 0.092          |    |
| Nausea                       | 25 (29.4)  | 38 (13.8) | 2.61 (1.47-4.64)    | 0.002          | **  | 5 ( 5.9)   | 3 ( 1.1)  | 5.34 (1.37-20.86)   | 0.020          | *  |
| Vomiting                     | 38 (17.6)  | 25 (17.2) | 1.02 (0.59-1.77)    | 1              |     | 6 ( 2.8)   | 2 ( 1.4)  | 1.77 (0.41-7.74)    | 0.483          |    |
| Diarrhea<br>(≥ 10 times/day) | 27 (28.4)  | 34 (13.3) | 2.58 (1.46-4.56)    | 0.001          | **  | 6 ( 6.3)   | 2 ( 0.8)  | 7.36 (1.68-32.3)    | 0.006          | ** |
| Abdominal pain               | 25 (27.5)  | 38 (14.1) | 2.32 (1.31-4.09)    | 0.006          | **  | 5 ( 5.5)   | 3 ( 1.1)  | 4.86 (1.24-18.97)   | 0.027          | *  |
| Fecal WBC                    | 3 (18.8)   | 27 (25.7) | 0.74 (0.21-2.59)    | 0.758          |     | 0 ( 0.0)   | 5 ( 4.8)  | 0.55 (0.03-10.49)   | 1              |    |
| Fecal RBC                    | 4 (23.5)   | 17 (23.9) | 1.04 (0.31-3.43)    | 1              |     | 1 ( 5.9)   | 3 ( 4.2)  | 1.78 (0.24-12.98)   | 1              |    |
| Hospital stay                |            |           | 0.16 (-0.76, 1.09)  | 0.731          |     |            |           | -0.16 (-2.77, 2.44) | 0.903          |    |
| <b><i>Sapovirus</i></b>      | <b>Yes</b> | <b>No</b> | <b>OR</b>           | <b>P-value</b> |     | <b>Yes</b> | <b>No</b> | <b>OR</b>           | <b>P-value</b> |    |
| Fever                        | 11 ( 4.0)  | 4 ( 4.7)  | 0.78 (0.26-2.4)     | 0.759          |     | 7 ( 2.5)   | 2 ( 2.4)  | 0.93 (0.22-3.97)    | 1              |    |
| Nausea                       | 7 ( 8.2)   | 8 ( 2.9)  | 3.02 (1.1-8.32)     | 0.055          |     | 5 ( 5.9)   | 4 ( 1.4)  | 4.14 (1.16-14.74)   | 0.037          | *  |
| Vomiting                     | 11 ( 5.1)  | 4 ( 2.8)  | 1.76 (0.58-5.34)    | 0.421          |     | 6 ( 2.8)   | 3 ( 2.1)  | 1.26 (0.34-4.69)    | 0.745          |    |
| Diarrhea<br>(≥ 10 times/day) | 1 ( 1.1)   | 13 ( 5.1) | 0.29 (0.05-1.57)    | 0.124          |     | 1 ( 1.1)   | 7 ( 2.7)  | 0.53 (0.09-3.08)    | 0.688          |    |
| Abdominal pain               | 2 ( 2.2)   | 13 ( 4.8) | 0.53 (0.14-2.1)     | 0.373          |     | 2 ( 2.2)   | 7 ( 2.6)  | 0.98 (0.23-4.19)    | 1              |    |
| Fecal WBC                    | 0 ( 0.0)   | 3 ( 2.9)  | 0.89 (0.04-17.98)   | 1              |     | 0 ( 0.0)   | 2 ( 1.9)  | 1.25 (0.06-27.31)   | 1              |    |
| Fecal RBC                    | 1 ( 5.9)   | 1 ( 1.4)  | 4.27 (0.42-43.73)   | 0.351          |     | 1 ( 5.9)   | 0 ( 0.0)  | 13 (0.51-333.64)    | 0.193          |    |
| Hospital stay                |            |           | -0.33 (-2.28, 1.63) | 0.744          |     |            |           | -0.37 (-2.97, 2.24) | 0.783          |    |
| <b><i>Astrovirus</i></b>     | <b>Yes</b> | <b>No</b> | <b>OR</b>           | <b>P-value</b> |     | <b>Yes</b> | <b>No</b> | <b>OR</b>           | <b>P-value</b> |    |
| Fever                        | 9 ( 3.3)   | 2 ( 2.4)  | 1.19 (0.29-4.88)    | 1              |     | 6 ( 2.2)   | 2 ( 2.4)  | 0.8 (0.18-3.52)     | 1              |    |
| Nausea                       | 2 ( 2.4)   | 9 ( 3.3)  | 0.84 (0.2-3.47)     | 1              |     | 2 ( 2.4)   | 6 ( 2.2)  | 1.25 (0.28-5.47)    | 1              |    |
| Vomiting                     | 7 ( 3.2)   | 4 ( 2.8)  | 1.13 (0.34-3.69)    | 1              |     | 5 ( 2.3)   | 3 ( 2.1)  | 1.06 (0.27-4.11)    | 1              |    |
| Diarrhea<br>(≥ 10 times/day) | 4 ( 4.2)   | 7 ( 2.7)  | 1.63 (0.49-5.37)    | 0.498          |     | 3 ( 3.2)   | 5 ( 2.0)  | 1.72 (0.44-6.72)    | 0.452          |    |
| Abdominal pain               | 2 ( 2.2)   | 9 ( 3.3)  | 0.77 (0.19-3.16)    | 0.737          |     | 2 ( 2.2)   | 6 ( 2.2)  | 1.14 (0.26-4.98)    | 1              |    |
| Fecal WBC                    | 1 ( 6.2)   | 3 ( 2.9)  | 2.83 (0.39-20.65)   | 0.437          |     | 1 ( 6.2)   | 1 ( 1.0)  | 6.74 (0.66-68.96)   | 0.248          |    |
| Fecal RBC                    | 0 ( 0.0)   | 1 ( 1.4)  | 1.34 (0.05-34.4)    | 1              |     | 0 ( 0.0)   | 1 ( 1.4)  | 1.34 (0.05-34.4)    | 1              |    |
| Hospital stay                |            |           | -0.93 (-3.13, 1.28) | 0.412          |     |            |           | -1.02 (-3.93, 1.88) | 0.49           |    |
| <b><i>Salmonella</i></b>     | <b>Yes</b> | <b>No</b> | <b>OR</b>           | <b>P-value</b> |     | <b>Yes</b> | <b>No</b> | <b>OR</b>           | <b>P-value</b> |    |
| Fever                        | 34 (12.3)  | 9 (10.6)  | 1.15 (0.53-2.46)    | 0.848          |     | 7 ( 2.5)   | 0 ( 0.0)  | 4.76 (0.27-84.19)   | 0.206          |    |
| Nausea                       | 8 ( 9.4)   | 35 (12.7) | 0.75 (0.34-1.65)    | 0.565          |     | 2 ( 2.4)   | 5 ( 1.8)  | 1.48 (0.32-6.72)    | 0.670          |    |
| Vomiting                     | 22 (10.2)  | 21 (14.5) | 0.67 (0.36-1.26)    | 0.247          |     | 4 ( 1.9)   | 3 ( 2.1)  | 0.86 (0.21-3.54)    | 1              |    |
| Diarrhea<br>(≥ 10 times/day) | 20 (21.1)  | 22 ( 8.6) | 2.82 (1.47-5.41)    | 0.003          | **  | 3 ( 3.2)   | 4 ( 1.6)  | 2.11 (0.51-8.72)    | 0.395          |    |
| Abdominal pain               | 12 (13.2)  | 31 (11.5) | 1.2 (0.59-2.41)     | 0.709          |     | 5 ( 5.5)   | 2 ( 0.7)  | 6.83 (1.5-31.05)    | 0.013          | *  |
| Fecal WBC                    | 3 (18.8)   | 11 (10.5) | 2.13 (0.57-8.02)    | 0.396          |     | 0 ( 0.0)   | 3 ( 2.9)  | 0.89 (0.04-17.98)   | 1              |    |
| Fecal RBC                    | 4 (23.5)   | 8 (11.3)  | 2.49 (0.69-9)       | 0.236          |     | 0 ( 0.0)   | 1 ( 1.4)  | 1.34 (0.05-34.4)    | 1              |    |
| Hospital stay                |            |           | -0.59 (-1.66, 0.48) | 0.282          |     |            |           | -0.01 (-2.92, 2.9)  | 0.995          |    |
| <b><i>Plesiomonas</i></b>    | <b>Yes</b> | <b>No</b> | <b>OR</b>           | <b>P-value</b> |     | <b>Yes</b> | <b>No</b> | <b>OR</b>           | <b>P-value</b> |    |
| Fever                        | 18 ( 6.5)  | 14 (16.5) | 0.35 (0.17-0.74)    | 0.008          | **  | 3 ( 1.1)   | 3 ( 3.5)  | 0.3 (0.07-1.35)     | 0.145          |    |
| Nausea                       | 10 (11.8)  | 22 ( 8.0) | 1.57 (0.72-3.42)    | 0.281          |     | 1 ( 1.2)   | 5 ( 1.8)  | 0.88 (0.14-5.42)    | 1              |    |
| Vomiting                     | 21 ( 9.7)  | 11 ( 7.6) | 1.29 (0.61-2.72)    | 0.573          |     | 2 ( 0.9)   | 4 ( 2.8)  | 0.37 (0.08-1.75)    | 0.224          |    |
| Diarrhea<br>(≥ 10 times/day) | 9 ( 9.5)   | 22 ( 8.6) | 1.14 (0.51-2.53)    | 0.833          |     | 0 ( 0.0)   | 6 ( 2.4)  | 0.2 (0.01-3.6)      | 0.196          |    |
| Abdominal pain               | 18 (19.8)  | 14 ( 5.2) | 4.45 (2.14-9.28)    | < 0.001        | *** | 4 ( 4.4)   | 2 ( 0.7)  | 5.52 (1.16-26.41)   | 0.037          | *  |
| Fecal WBC                    | 1 ( 6.2)   | 15 (14.3) | 0.57 (0.1-3.29)     | 0.692          |     | 0 ( 0.0)   | 4 ( 3.8)  | 0.68 (0.04-13.29)   | 1              |    |
| Fecal RBC                    | 1 ( 5.9)   | 9 (12.7)  | 0.6 (0.1-3.64)      | 0.679          |     | 0 ( 0.0)   | 2 ( 2.8)  | 0.79 (0.04-17.31)   | 1              |    |
| Hospital stay                |            |           | -0.19 (-1.43, 1.04) | 0.759          |     |            |           | -0.98 (-3.58, 1.63) | 0.462          |    |
| <b><i>ETEC (elt)</i></b>     | <b>Yes</b> | <b>No</b> | <b>OR</b>           | <b>P-value</b> |     | <b>Yes</b> | <b>No</b> | <b>OR</b>           | <b>P-value</b> |    |
| Fever                        | 27 ( 9.8)  | 7 ( 8.2)  | 1.15 (0.49-2.69)    | 0.832          |     | 4 ( 1.4)   | 2 ( 2.4)  | 0.55 (0.12-2.64)    | 0.629          |    |
| Nausea                       | 8 ( 9.4)   | 26 ( 9.4) | 1.04 (0.46-2.34)    | 1              |     | 3 ( 3.5)   | 3 ( 1.1)  | 3.32 (0.74-14.89)   | 0.145          |    |
| Vomiting                     | 21 ( 9.7)  | 13 ( 9.0) | 1.08 (0.53-2.21)    | 0.856          |     | 2 ( 0.9)   | 4 ( 2.8)  | 0.37 (0.08-1.75)    | 0.224          |    |
| Diarrhea<br>(≥ 10 times/day) | 10 (10.5)  | 24 ( 9.4) | 1.16 (0.54-2.49)    | 0.839          |     | 3 ( 3.2)   | 3 ( 1.2)  | 2.73 (0.61-12.24)   | 0.350          |    |
| Abdominal pain               | 7 ( 7.7)   | 27 (10.0) | 0.79 (0.34-1.83)    | 0.678          |     | 2 ( 2.2)   | 4 ( 1.5)  | 1.65 (0.35-7.91)    | 0.644          |    |
| Fecal WBC                    | 3 (18.8)   | 8 ( 7.6)  | 2.97 (0.76-11.69)   | 0.161          |     | 0 ( 0.0)   | 1 ( 1.0)  | 2.11 (0.08-54.04)   | 1              |    |
| Fecal RBC                    | 3 (17.6)   | 5 ( 7.0)  | 2.92 (0.68-12.51)   | 0.180          |     | 0 ( 0.0)   | 0 ( 0.0)  | 4.09 (0.08-213.19)  | 1              |    |
| Hospital stay                |            |           | -0.37 (-1.56, 0.82) | 0.540          |     |            |           | -1.28 (-4.18, 1.62) | 0.389          |    |

\*,  $P < 0.05$ ; \*\*,  $P < 0.01$ ; \*\*\*,  $P < 0.001$ .

**Table S2. Detection of enteropathogens in patients under and over five years of age using qPCR assays**

|                              | Number of positive (%)<br>in all cases |           |                  |                 | Number of positive (%)<br>in cases under Cq-cutoff<br>value |           |                   |                 |    |
|------------------------------|----------------------------------------|-----------|------------------|-----------------|-------------------------------------------------------------|-----------|-------------------|-----------------|----|
|                              | < 5 yrs                                | ≥ 5 yrs   | OR               | <i>P</i> -value | < 5 yrs                                                     | ≥ 5 yrs   | OR                | <i>P</i> -value |    |
| <b>Rotavirus</b>             | 83 (34.4)                              | 21 (16.3) | 0.38 (0.22-0.64) | < 0.001         | 64 (26.6)                                                   | 16 (12.4) | 0.4 (0.22-0.72)   | 0.001           | ** |
| <b>Norovirus GII</b>         | 50 (20.7)                              | 11 ( 8.5) | 0.37 (0.19-0.73) | 0.003           | 26 (10.8)                                                   | 3 ( 2.3)  | 0.22 (0.07-0.7)   | 0.004           | ** |
| <b><i>Shigella</i> /EIEC</b> | 21 ( 8.7)                              | 20 (15.5) | 1.92 (1.01-3.67) | 0.056           | 6 ( 2.5)                                                    | 15 (11.6) | 4.9 (1.91-12.59)  | 0.001           | ** |
| <b><i>Campylobacter</i></b>  | 30 (12.4)                              | 10 ( 7.8) | 0.61 (0.29-1.27) | 0.218           | 16 ( 6.6)                                                   | 2 ( 1.6)  | 0.27 (0.07-1.03)  | 0.040           | *  |
| <b>EAEC (<i>aggR</i>)</b>    | 64 (26.6)                              | 39 (30.2) | 1.2 (0.75-1.92)  | 0.467           | 10 ( 4.1)                                                   | 1 ( 0.8)  | 0.26 (0.05-1.44)  | 0.106           |    |
| <b>EAEC (<i>astA</i>)</b>    | 133 (55.2)                             | 88 (68.2) | 1.73 (1.11-2.71) | 0.019           | 8 ( 3.3)                                                    | 2 ( 1.6)  | 0.54 (0.13-2.24)  | 0.504           |    |
| <b><i>Aeromonas</i></b>      | 34 (14.1)                              | 32 (24.8) | 2 (1.17-3.43)    | 0.015           | 2 ( 0.8)                                                    | 7 ( 5.4)  | 5.87 (1.38-24.95) | 0.010           | *  |
| <b>Sapovirus</b>             | 13 ( 5.4)                              | 2 ( 1.6)  | 0.33 (0.08-1.3)  | 0.097           | 7 ( 2.9)                                                    | 2 ( 1.6)  | 0.61 (0.14-2.61)  | 0.505           |    |
| <b>Astrovirus</b>            | 8 ( 3.3)                               | 5 ( 3.9)  | 1.21 (0.41-3.63) | 0.774           | 5 ( 2.1)                                                    | 3 ( 2.3)  | 1.19 (0.31-4.62)  | 1               |    |
| <b><i>Salmonella</i></b>     | 31 (12.9)                              | 12 ( 9.3) | 0.71 (0.36-1.42) | 0.395           | 3 ( 1.2)                                                    | 4 ( 3.1)  | 2.44 (0.59-10.04) | 0.244           |    |
| <b><i>Plesiomonas</i></b>    | 11 ( 4.6)                              | 22 (17.1) | 4.2 (1.99-8.85)  | < 0.001         | 1 ( 0.4)                                                    | 5 ( 3.9)  | 7.08 (1.15-43.64) | 0.021           | *  |
| <b>ETEC (<i>elt</i>)</b>     | 29 (12.0)                              | 6 ( 4.7)  | 0.38 (0.16-0.91) | 0.024           | 4 ( 1.7)                                                    | 2 ( 1.6)  | 1.03 (0.22-4.93)  | 1               |    |

\*, *P* < 0.05 ; \*\*, *P* < 0.01; \*\*\*, *P* < 0.001.

**Table S3. Number of pathogens detected in each month or season based on qPCR in 370 diarrheal cases**

|                                | Hot |     |     |     | Rainy |     |     |     | Dry and cool |     |     |     | P-value |     |
|--------------------------------|-----|-----|-----|-----|-------|-----|-----|-----|--------------|-----|-----|-----|---------|-----|
|                                | Mar | Apr | May | Jun | Jul   | Aug | Sep | Oct | Nov          | Dec | Jan | Feb |         |     |
| Rotavirus                      | 9   | 3   | 4   | 4   | 2     | 3   | 1   | 0   | 6            | 9   | 14  | 49  | <0.001  | *** |
| Rotavirus –Cut-off*            | 7   | 3   | 4   | 3   | 1     | 2   | 1   | 0   | 5            | 5   | 11  | 38  | <0.001  | *** |
| Norovirus GII                  | 6   | 0   | 1   | 2   | 6     | 2   | 0   | 0   | 4            | 13  | 12  | 15  | 0.004   | **  |
| Norovirus GII –Cut-off         | 4   | 0   | 1   | 1   | 3     | 0   | 0   | 0   | 2            | 5   | 5   | 8   | 0.093   | -   |
| <i>Shigella</i> /EIEC          | 1   | 0   | 3   | 2   | 9     | 3   | 2   | 2   | 1            | 7   | 3   | 8   | 0.134   | -   |
| <i>Shigella</i> /EIEC –Cut-off | 0   | 0   | 1   | 1   | 7     | 2   | 1   | 1   | 0            | 3   | 2   | 3   | 0.026   | *   |
| <i>Campylobacter</i>           | 1   | 3   | 2   | 2   | 5     | 5   | 0   | 5   | 2            | 5   | 4   | 6   | 0.207   | -   |
| <i>Campylobacter</i> –Cut-off  | 1   | 2   | 1   | 1   | 1     | 1   | 0   | 4   | 0            | 3   | 1   | 3   | 0.421   | -   |
| EAEC ( <i>aggR</i> )           | 11  | 4   | 3   | 6   | 12    | 7   | 8   | 8   | 7            | 10  | 8   | 19  | 0.031   | *   |
| EAEC ( <i>aggR</i> ) –Cut-off  | 1   | 1   | 1   | 1   | 2     | 0   | 0   | 1   | 0            | 1   | 1   | 2   | 0.355   | -   |
| EAEC ( <i>astA</i> )           | 18  | 9   | 7   | 6   | 20    | 14  | 11  | 16  | 18           | 27  | 25  | 50  | 0.270   | -   |
| EAEC ( <i>astA</i> ) –Cut-off  | 0   | 0   | 1   | 1   | 0     | 0   | 0   | 0   | 1            | 3   | 3   | 1   | 0.112   | -   |
| <i>Aeromonas</i>               | 7   | 4   | 4   | 4   | 4     | 5   | 1   | 9   | 6            | 4   | 8   | 10  | 0.100   | -   |
| <i>Aeromonas</i> –Cut-off      | 1   | 1   | 1   | 0   | 1     | 0   | 0   | 2   | 2            | 0   | 1   | 0   | 0.391   | -   |
| Sapovirus                      | 0   | 0   | 0   | 1   | 5     | 2   | 0   | 0   | 2            | 2   | 3   | 0   | 0.138   | -   |
| Sapovirus –Cut-off             | 0   | 0   | 0   | 1   | 2     | 1   | 0   | 0   | 2            | 1   | 2   | 0   | 0.822   | -   |
| Astrovirus                     | 0   | 1   | 0   | 0   | 0     | 1   | 0   | 0   | 0            | 5   | 4   | 2   | 0.100   | -   |
| Astrovirus –Cut-off            | 0   | 0   | 0   | 0   | 0     | 1   | 0   | 0   | 0            | 4   | 1   | 2   | 0.193   | -   |
| <i>Salmonella</i>              | 5   | 1   | 0   | 0   | 5     | 2   | 1   | 9   | 2            | 2   | 3   | 13  | 0.092   | -   |
| <i>Salmonella</i> –Cut-off     | 0   | 0   | 0   | 0   | 1     | 0   | 0   | 1   | 1            | 0   | 0   | 4   | 0.515   | -   |
| <i>Plesiomonas</i>             | 4   | 2   | 1   | 3   | 5     | 0   | 2   | 5   | 3            | 3   | 3   | 2   | 0.045   | *   |
| <i>Plesiomonas</i> –Cut-off    | 0   | 0   | 0   | 0   | 3     | 0   | 0   | 0   | 2            | 1   | 0   | 0   | 0.299   | -   |
| ETEC ( <i>elt</i> )            | 2   | 1   | 0   | 0   | 5     | 4   | 2   | 0   | 3            | 7   | 4   | 7   | 0.154   | -   |
| ETEC ( <i>elt</i> ) –Cut-off   | 0   | 1   | 0   | 0   | 3     | 0   | 0   | 0   | 0            | 0   | 0   | 2   | 0.414   | -   |

\*, Pathogen positives under cut-off values (see Table 1).

**Table S4. Basic information of the 370 diarrheal and 370 non-diarrheal control subjects**

| Characteristics               | Diarrhea (%) | Control (%) | OR               | P-value |
|-------------------------------|--------------|-------------|------------------|---------|
| No. of subject                | 370 (100)    | 370 (100)   |                  |         |
| <b>Age group in years</b>     |              |             |                  |         |
| < 5                           | 241 (65.1)   | 232 (62.7)  | ref              | -       |
| 5-15                          | 38 (10.3)    | 46 (12.4)   | 0.80 (0.5-1.27)  | 0.337   |
| 16-59                         | 53 (14.3)    | 56 (15.1)   | 0.91 (0.6-1.38)  | 0.662   |
| ≥ 60                          | 38 (10.3)    | 36 (9.7)    | 1.02 (0.62-1.66) | 0.949   |
| <b>Sex</b>                    |              |             |                  |         |
| Male                          | 224 (60.5)   | 189 (51.1)  | 1.44 (1.08-1.94) | 0.014   |
| Female                        | 146 (39.5)   | 181 (48.9)  | ref              | -       |
| <b>Three periods (season)</b> |              |             |                  |         |
| Mar-Jun (hot)                 | 77 (20.8)    | 108 (29.2)  | -                | -       |
| Mar                           | 29 (37.7)    | 60 (55.6)   | 0.71 (0.4-1.29)  | 0.264   |
| Apr                           | 18 (23.4)    | 20 (18.5)   | 1.33 (0.63-2.81) | 0.456   |
| May                           | 12 (15.6)    | 12 (11.1)   | 1.48 (0.6-3.61)  | 0.393   |
| Jun                           | 18 (23.4)    | 16 (14.8)   | 1.66 (0.76-3.63) | 0.203   |
| Jul-Oct (rainy)               | 96 (25.9)    | 97 (26.2)   | -                | -       |
| Jul                           | 32 (33.3)    | 21 (21.6)   | 2.25 (1.15-4.43) | 0.019   |
| Aug                           | 22 (22.9)    | 19 (19.6)   | 1.71 (0.82-3.55) | 0.15    |
| Sep                           | 15 (15.6)    | 32 (33.0)   | 0.69 (0.33-1.44) | 0.323   |
| Oct                           | 27 (28.1)    | 25 (25.8)   | 1.60 (0.82-3.12) | 0.173   |
| Nov-Feb (cool and dry)        | 197 (53.2)   | 165 (44.6)  | -                | -       |
| Nov                           | 27 (13.7)    | 26 (15.8)   | 1.53 (0.79-2.99) | 0.208   |
| Dec                           | 38 (19.3)    | 24 (14.5)   | 2.34 (1.23-4.45) | 0.01    |
| Jan                           | 44 (22.3)    | 65 (39.4)   | ref              | -       |
| Feb                           | 88 (44.7)    | 50 (30.3)   | 2.60 (1.54-4.38) | 0       |
| <b>Disease profile</b>        |              |             |                  |         |
| Frequency of defecation       |              |             |                  |         |
| ≤ 5 times                     | 176 (50.3)   | -           | -                | -       |
| 6-9 times                     | 79 (22.6)    | -           | -                | -       |
| ≥10 times                     | 115 (31.1)   | -           | -                | -       |
| Stool condition               |              |             |                  |         |
| Semi solid                    | 9 ( 2.4)     | -           | -                | -       |
| Watery                        | 189 (51.1)   | -           | -                | -       |
| Liquid mucus                  | 131 (35.4)   | -           | -                | -       |
| Mucus                         | 24 ( 6.5)    | -           | -                | -       |
| Bloody mucus                  | 17 ( 4.6)    | -           | -                | -       |
| Fecal WBC (abnormal)          | 16 (13.2)    | -           | -                | -       |
| Fecal RBC (presence)          | 17 (19.3)    | -           | -                | -       |
| <b>Systemic syndrome</b>      |              |             |                  |         |
| Abdominal pain (Yes)          | 91 (25.1)    | -           | -                | -       |
| Vomiting (Yes)                | 216 (59.8)   | -           | -                | -       |
| Nausea (Yes)                  | 85 (23.5)    | -           | -                | -       |
| Fever (Yes)                   | 276 (76.5)   | -           | -                | -       |

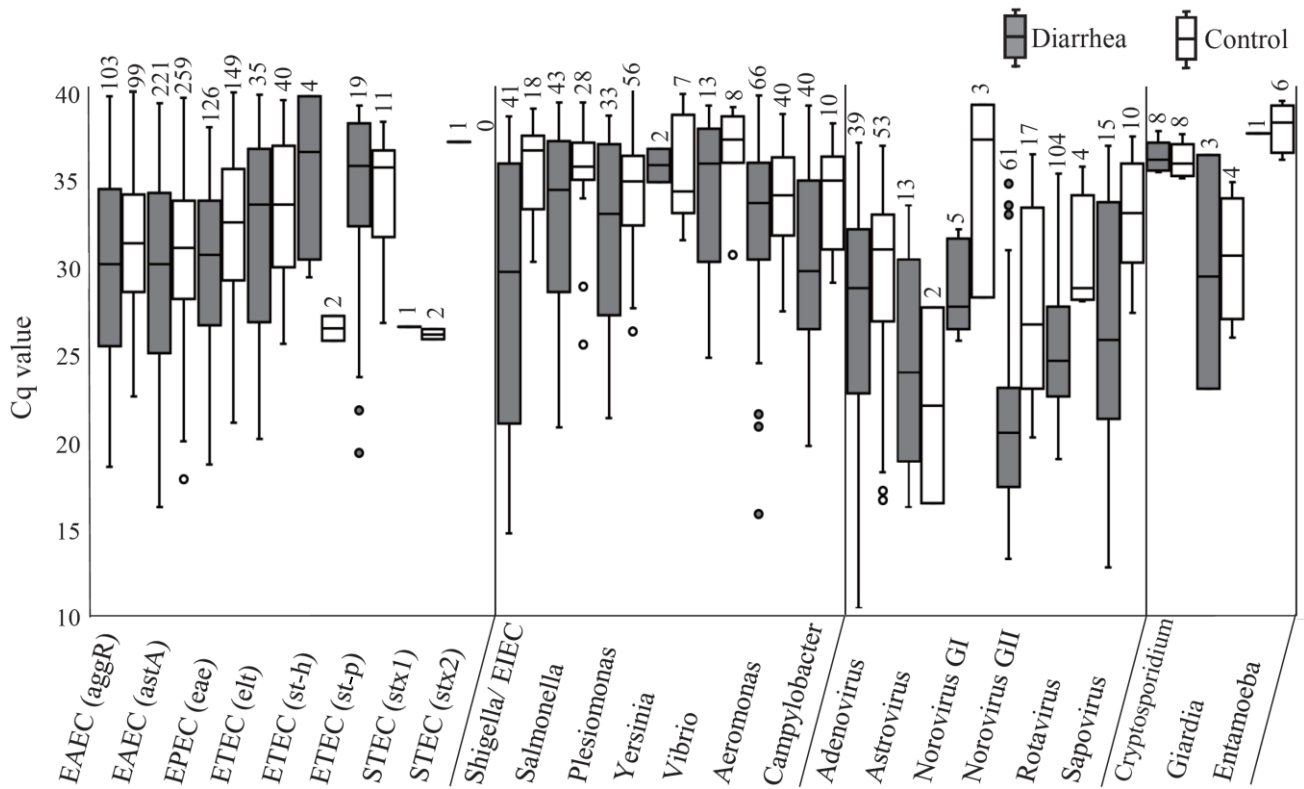

**Figure S1.** Box and whisker plot showing quantitation cycle (Cq) values of qPCR-positive samples for 24 target genes among 370 diarrheal and 370 non-diarrheal control subjects. The bottom and top of each box represent 25th and 75th percentiles of the data, respectively. The median value is displayed inside the box by the line. The maximum and minimum values are displayed with vertical lines connecting the points to the center box, along with the outliers represented herein indicated by closed and open circles. Numbers indicate the number of positive specimens.



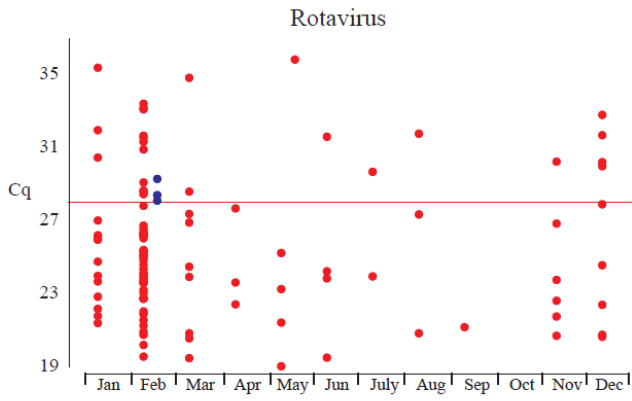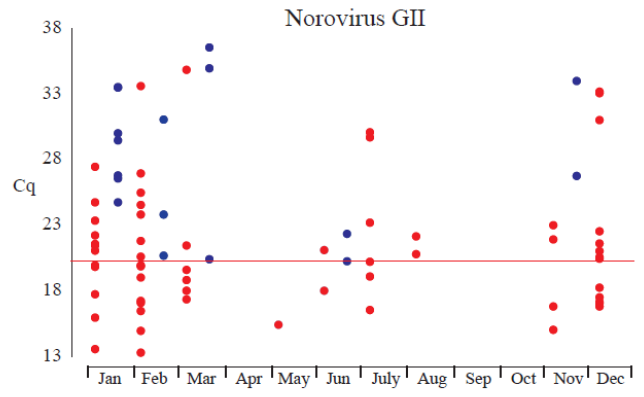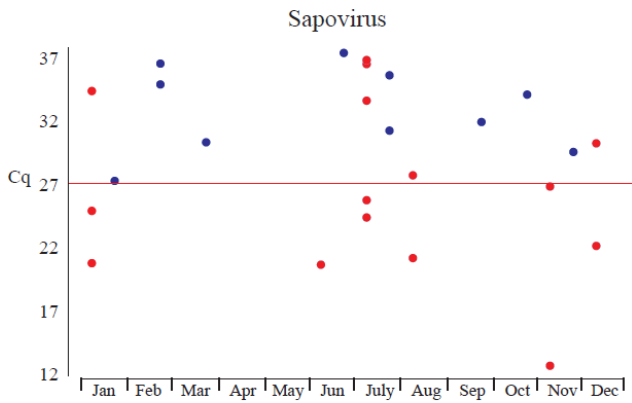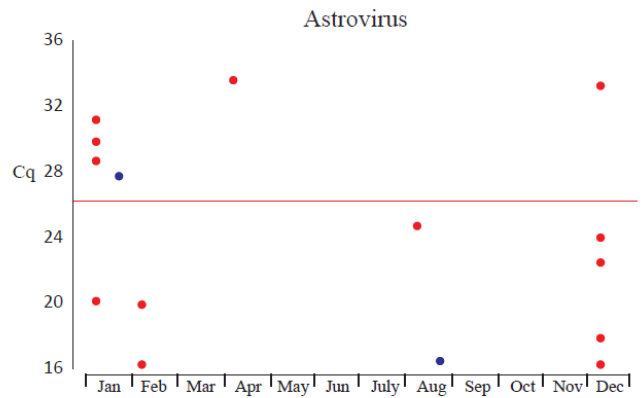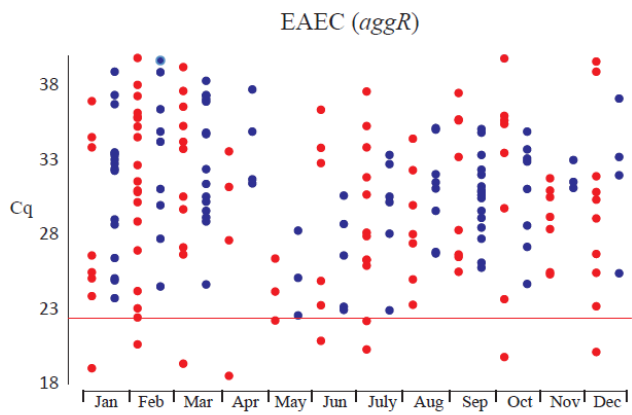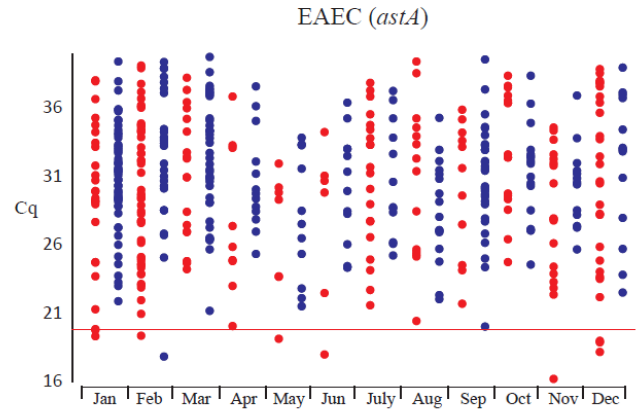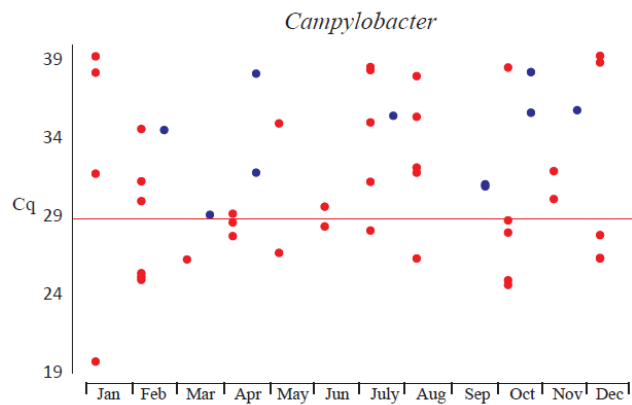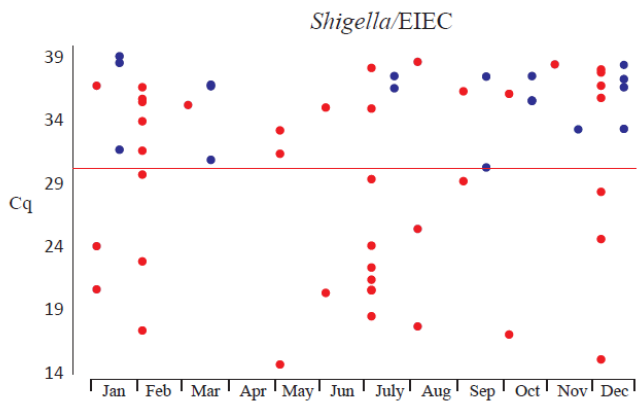

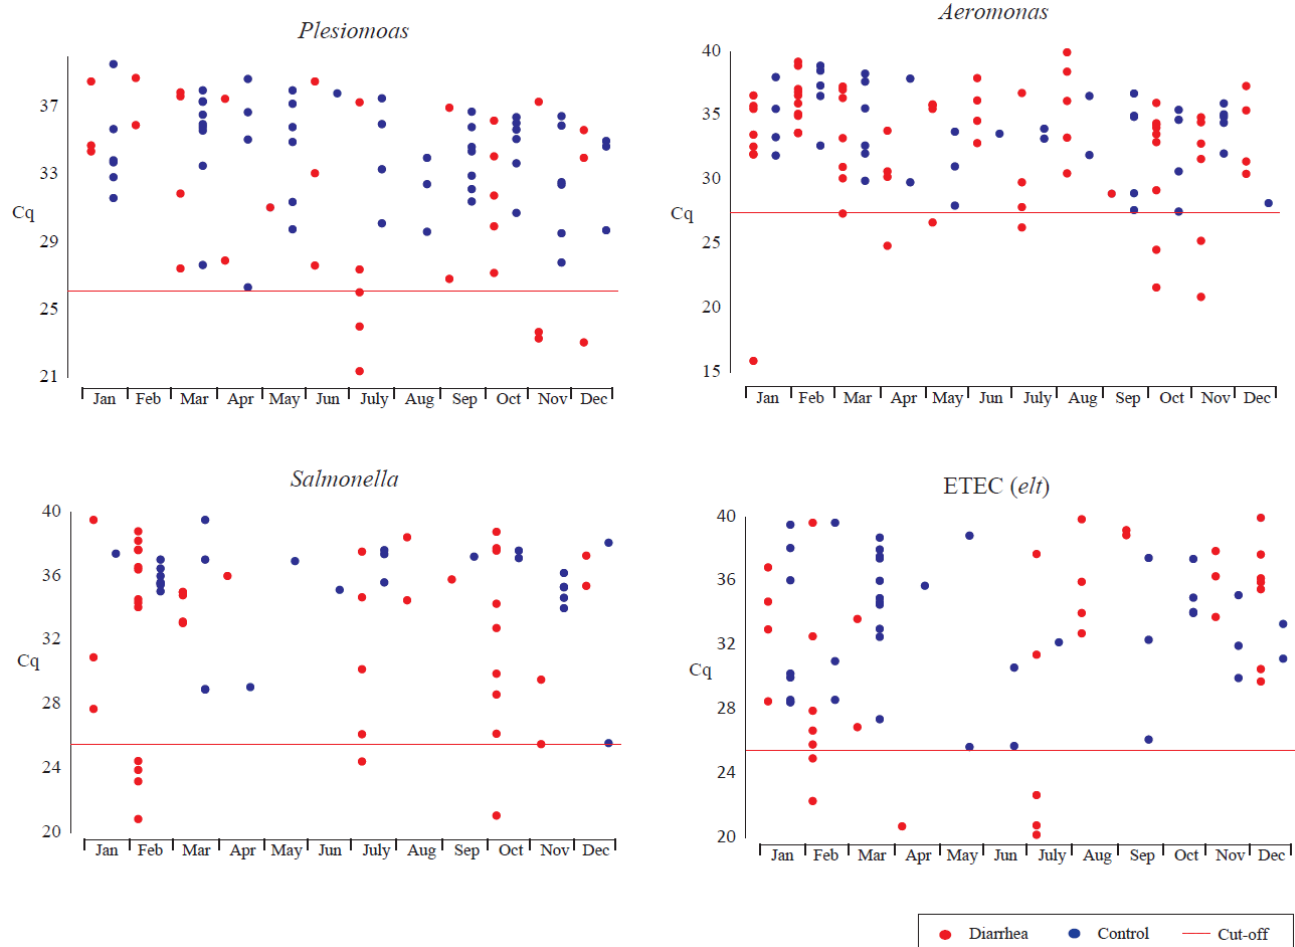

**Figure S2.** Detection of enteropathogens by month based on qPCR assays and distribution of Cq-values. The blue dots represent Cq values from the non-diarrheal control subjects and the red dots represent Cq values from the diarrheal patients. The red line indicates the cut-off value shown in Table 1.

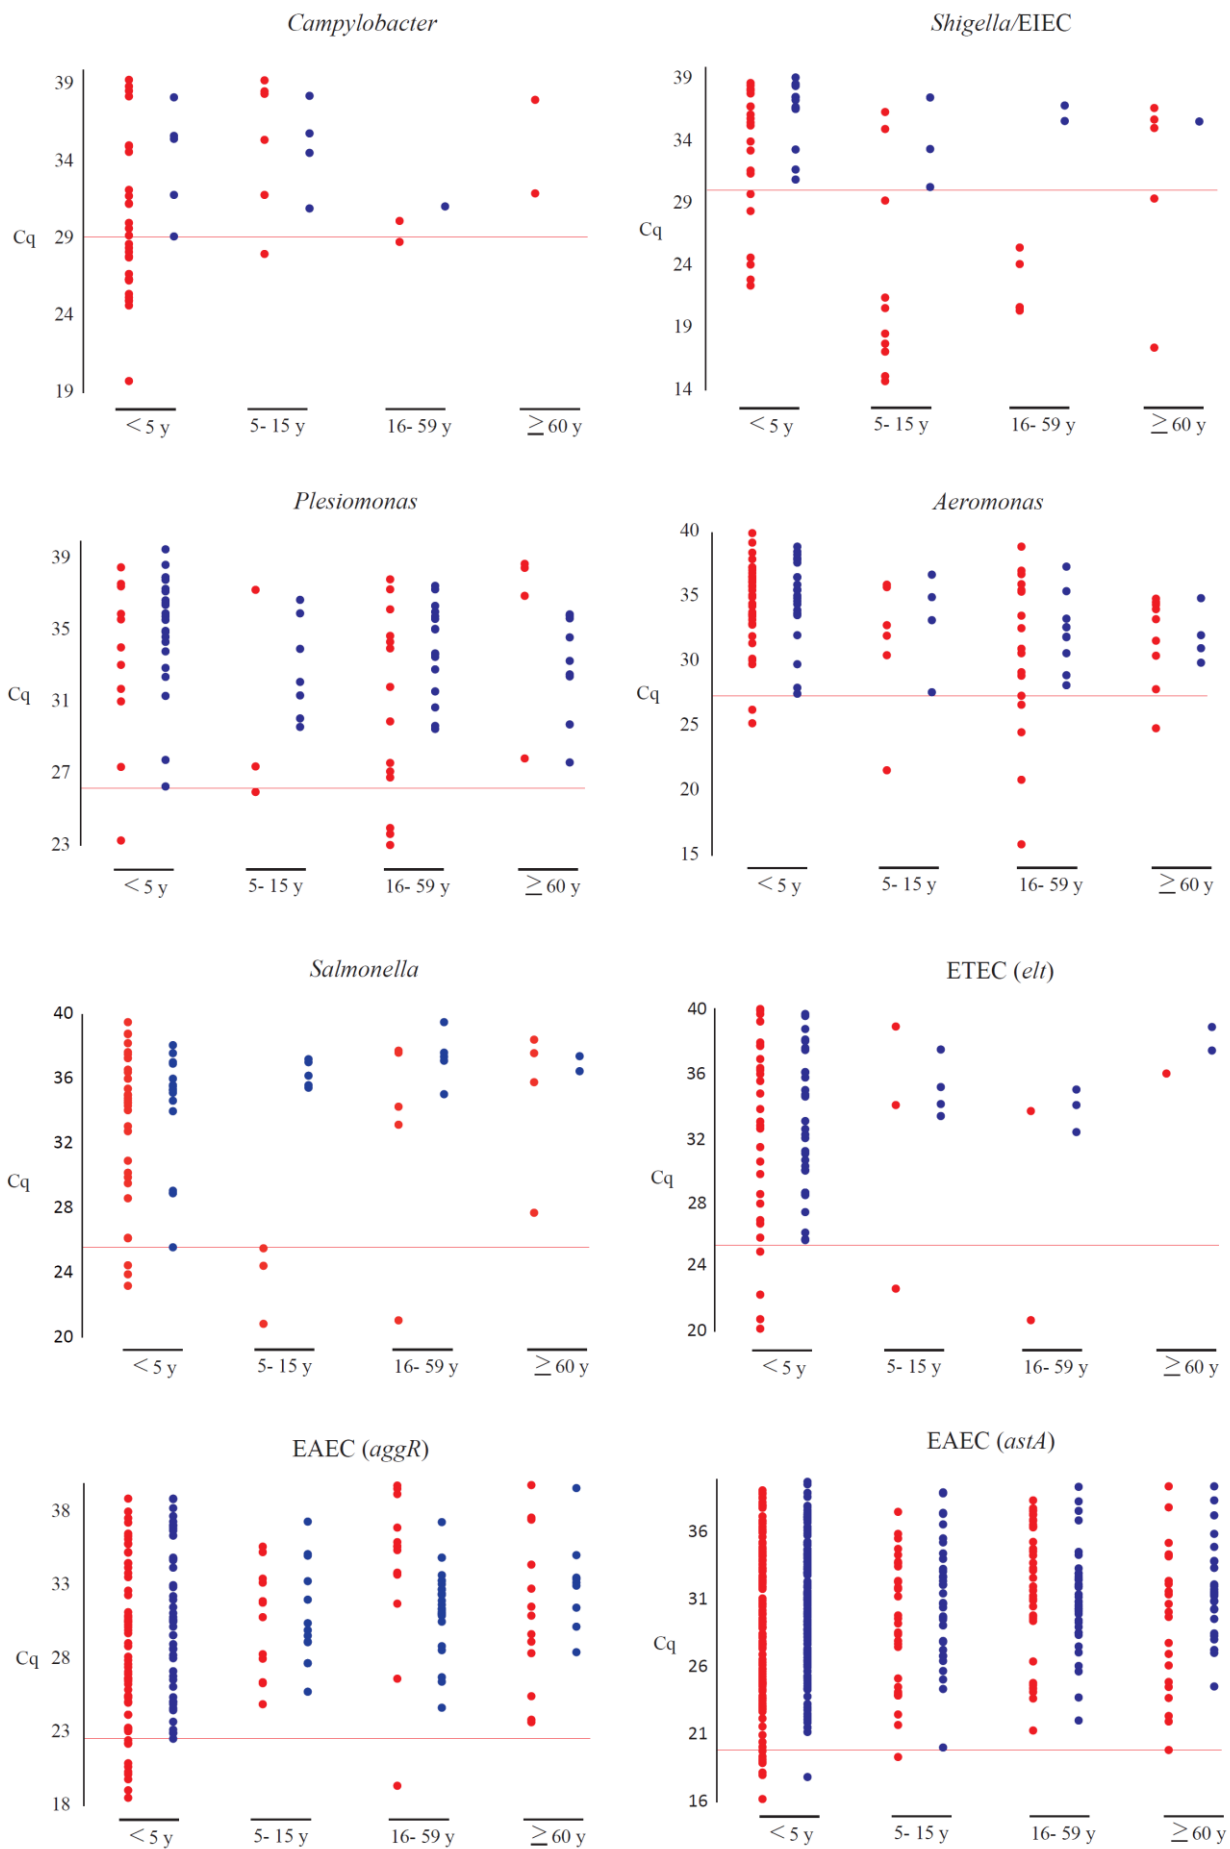

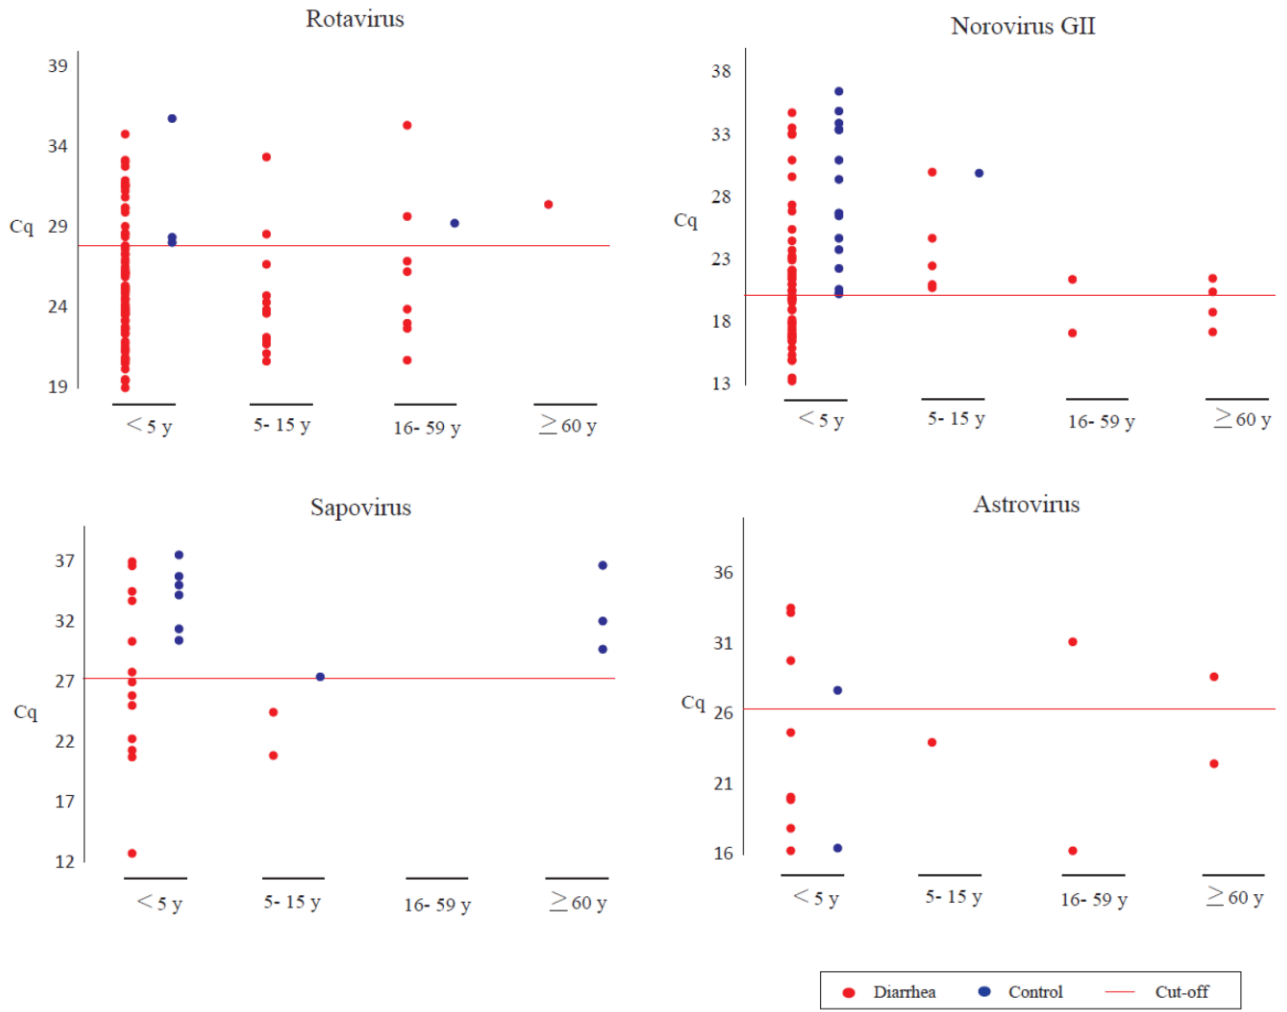

**Figure S3.** Detection of enteropathogens by age group using qPCR assays and distribution of Cq-values. The blue dots represent Cq values from the non-diarrheal control subjects and the red dots represent Cq values from the diarrheal patients. The red line indicates the cut-off value shown in Table 1.

### **Supplementary methods**

We reported the patient baseline characteristics and disease profile with proportions, stratified by the groups. The relationships between disease profile and pathogens detected/not detected in the cases were presented as ORs and *P*-values were determined using the Fisher's exact test, as shown in Table 1. Similarly, we also reported the relationships between disease profile and Cq-value (positive/negative).
